# Supplementary material for: Highly efficient and selective hydrogenation of unsaturated carbonyl compounds using Ni–Sn alloy catalysts
Source: Royal Society of Chemistry journal article supplement (doi:10.1039/c2cy20216f), 2012-01-01
Supplement: c2cy20216f.pdf [file c2cy20216f.pdf]

*Electronic Supplementary Information for*

**Highly efficient and selective hydrogenation of unsaturated carbonyl compounds using Ni-Sn alloy catalysts**

**Rodiansono,<sup>a,b</sup> Syahrul Khairi,<sup>a</sup> Takayoshi Hara,<sup>a</sup> Nobuyuki Ichikuni,<sup>a</sup> and Shogo Shimazu<sup>\*a</sup>**

<sup>a</sup>*Graduate School of Engineering, Chiba University, 1-33 Yayoi, Inage, Chiba 263-8522, Japan*  
Tel.: +81 43 290 3379; fax: +81 43 290 3379. *E-mail address:* shimazu@faculty.chiba-u.jp (S. Shimazu).

<sup>b</sup>*Department of Chemistry, Lambung Mangkurat University, Jl. A. Yani Km 36 Banjarbaru, Indonesia 70714.*

*Contents*

1. Multi-Rietveld analysis program LH-Riet profiles of powder XRD data for Ni-Sn(3.0) alloy catalyst (data from Figure 1a) (**Fig. S1**)
2. Multi-Rietveld analysis program LH-Riet profiles of powder XRD data for Ni-Sn(1.5) alloy catalyst (data from Figure 1b) (**Fig. S2**)
3. Multi-Rietveld analysis program LH-Riet profiles of powder XRD data for Ni-Sn(0.75) alloy catalyst (data from Figure 1c) (**Fig. S3**)
4. Results of support screening for Ni-Sn(1.5) alloy catalysts (**Table S1**).
5. XRD patterns of the recovered Ni-Sn(1.5)/TiO<sub>2</sub> alloy catalyst before and after reactivated by H<sub>2</sub> treatment at 673 K for 1 h (**Fig. S4**)

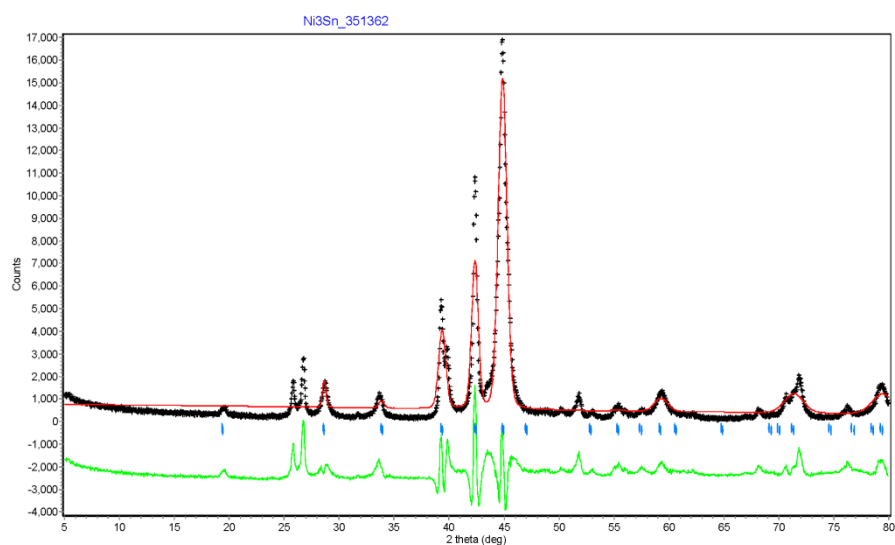

**Fig. S1** Multi-Rietveld analysis program LH-Riet profiles of powder XRD data for Ni-Sn(3.0) alloy catalyst after H<sub>2</sub> treatment at 673 K (data extracted from Figure 1a). Data points (black line); calculated line (red line); difference line (green line); marker points (blue vertical line).

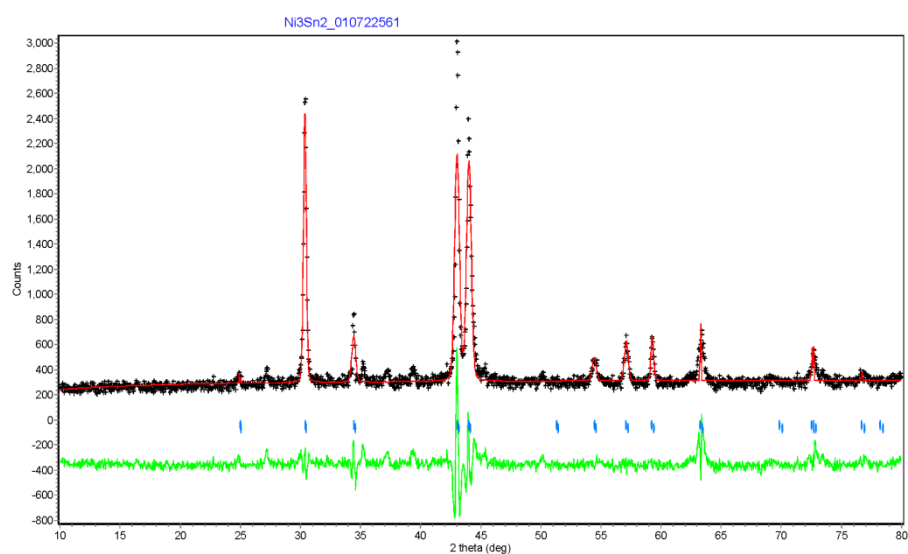

**Fig. S2** Multi-Rietveld analysis program LH-Riet profiles of powder XRD data for Ni-Sn(1.5) alloy catalyst after H<sub>2</sub> treatment at 673 K (data extracted from Figure 1b). Data points (black line); calculation line (red line); difference line (green line); marker points (blue vertical line).

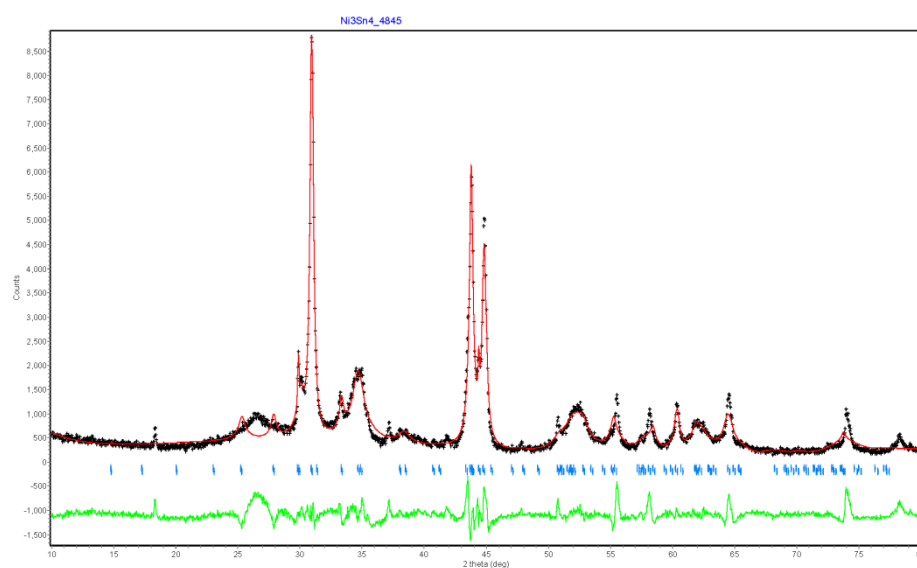

**Fig. S3** Multi-Rietveld analysis program LH-Riet profiles of powder XRD data for Ni-Sn(0.75) alloy catalyst after H<sub>2</sub> treatment at 673 K (data extracted from Figure 1c). Data points (black line); calculation line (red line); difference line (green line); marker points (blue vertical line).

**Table S1** Results of support screening for Ni-Sn(1.5) alloy catalysts

| Entry | Support          | Conv./% | Yield <sup>a</sup> /% | Select. <sup>b</sup> /% |
|-------|------------------|---------|-----------------------|-------------------------|
| 1     | MCM-41           | 20      | 20                    | 100 (0)                 |
| 2     | ZnO              | 62      | 61                    | 99(1)                   |
| 3     | ZrO <sub>2</sub> | 32      | 32                    | 100                     |
| 4     | MgO              | 8       | 0                     | 0                       |

*Reaction conditions:* FFald, 1.1 mmol (FFald/Ni ratio = 15);  
*iso*-PrOH (3 mL); H<sub>2</sub>, 3.0 MPa, 383 K, 75 min. <sup>a</sup> Yield of  
 FFalc, determined by GC using an internal standard technique.  
<sup>b</sup> Selectivity to FFalc. The value in the parenthesis is the  
 selectivity to THFalc.

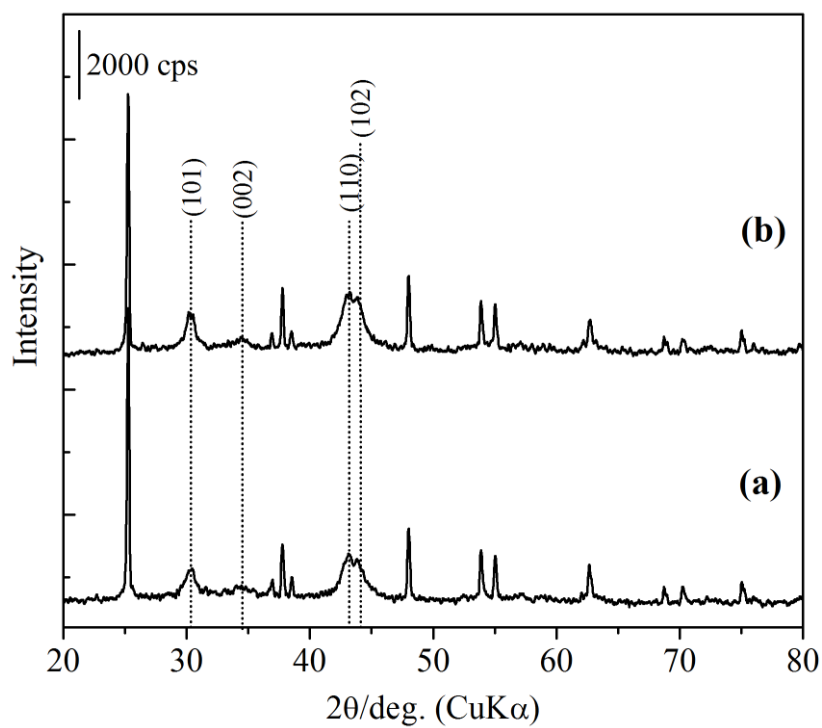

**Fig. S4** XRD patterns for the recovered Ni-Sn(1.5)/TiO<sub>2</sub> before and after H<sub>2</sub> treatment at 673 K for 1 h.
